# Supplementary material for: A preliminary study of the efficacy of the polyherbal preparation Sao Thong Tai for erectile dysfunction among elderly men: a double-blind, randomized controlled trial
Source: Springer Nature journal article supplement (doi:10.1186/s40816-022-00341-4), 2022-02-21
Supplement: MOESM1 [file 20152014]

This document certifies that the manuscript

## **A Preliminary Study of the Efficacy of the Multi-herb Preparation Sao Thong Tai for Erectile Dysfunction Among Elderly Men: Double-Blind, Randomized Controlled Trial**

prepared by the authors

**Chakariya Lin, Junya Pattraraachachai, Kammal K. Pawa, Surapote Wongyai**

was edited for proper English language, grammar, punctuation, spelling, and overall style by one or more of the highly qualified native English speaking editors at AJE.

This certificate was issued on **November 2, 2021** and may be verified on the [AJE website](#) using the verification code **F9E4-3D90-8EFC-A178-24EP**.

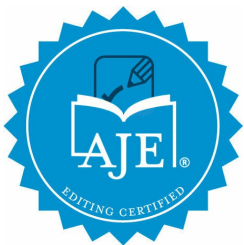

Neither the research content nor the authors' intentions were altered in any way during the editing process. Documents receiving this certification should be English-ready for publication; however, the author has the ability to accept or reject our suggestions and changes. To verify the final AJE edited version, please visit our verification page at [aje.com/certificate](#). If you have any questions or concerns about this edited document, please contact AJE at [support@aje.com](mailto:support@aje.com).
