# Supplementary material for: A preliminary study of the efficacy of the polyherbal preparation Sao Thong Tai for erectile dysfunction among elderly men: a double-blind, randomized controlled trial
Source: Springer Nature journal article supplement (doi:10.1186/s40816-022-00341-4), 2022-02-21
Supplement: MOESM2 [file 20152014]

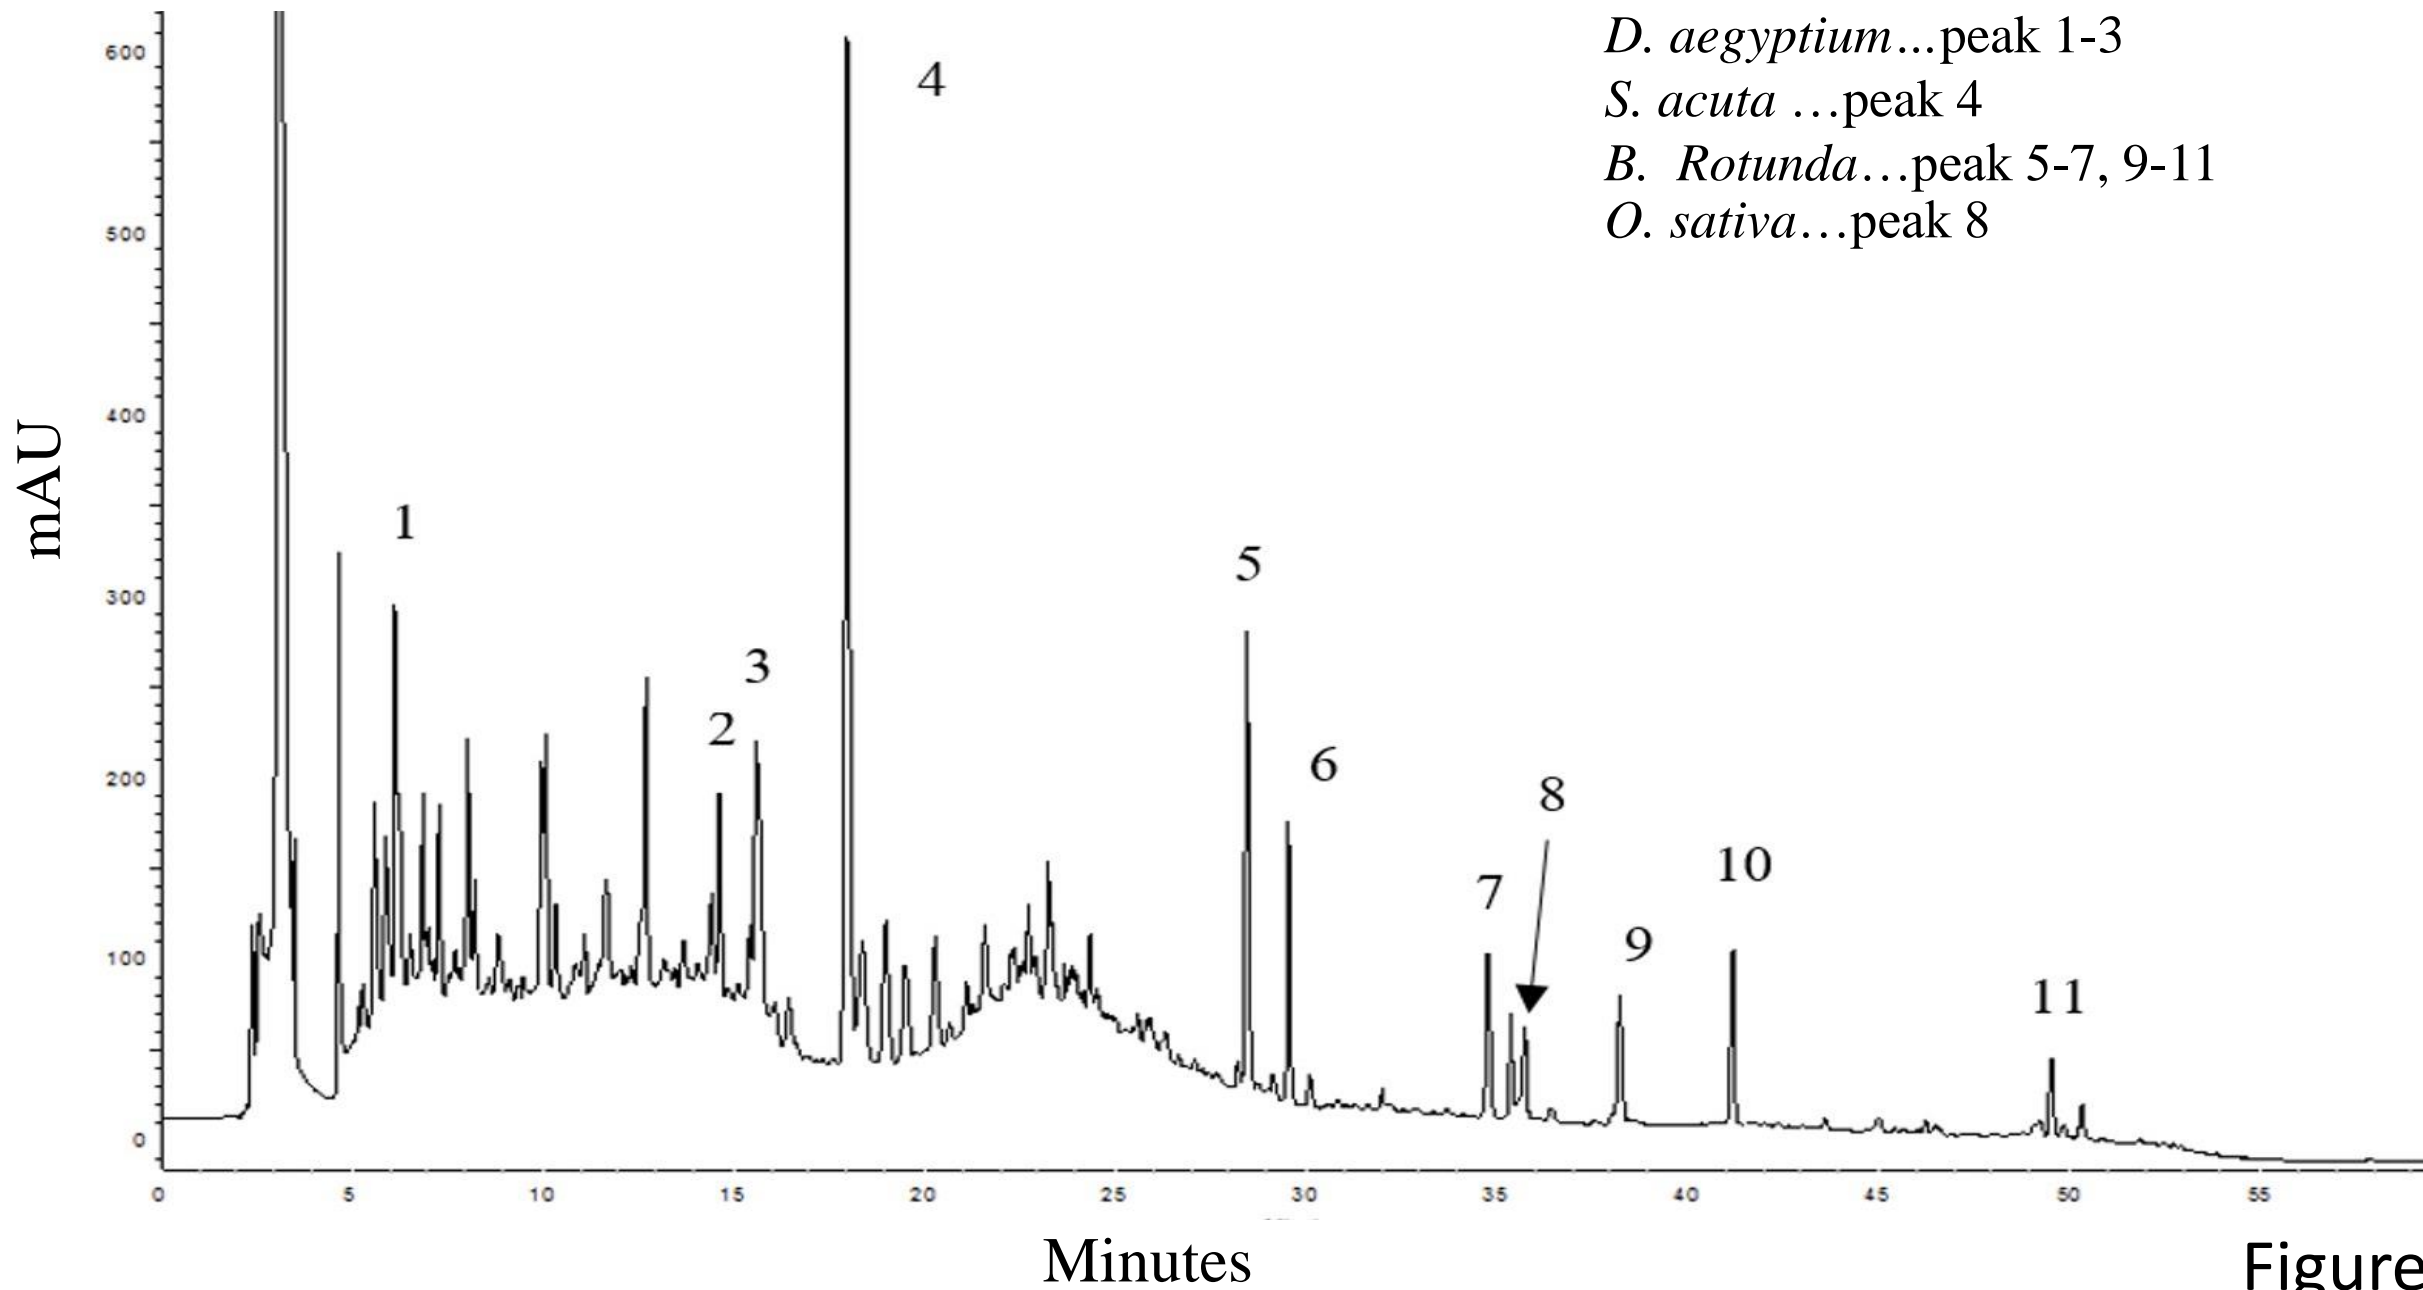

Figure 1

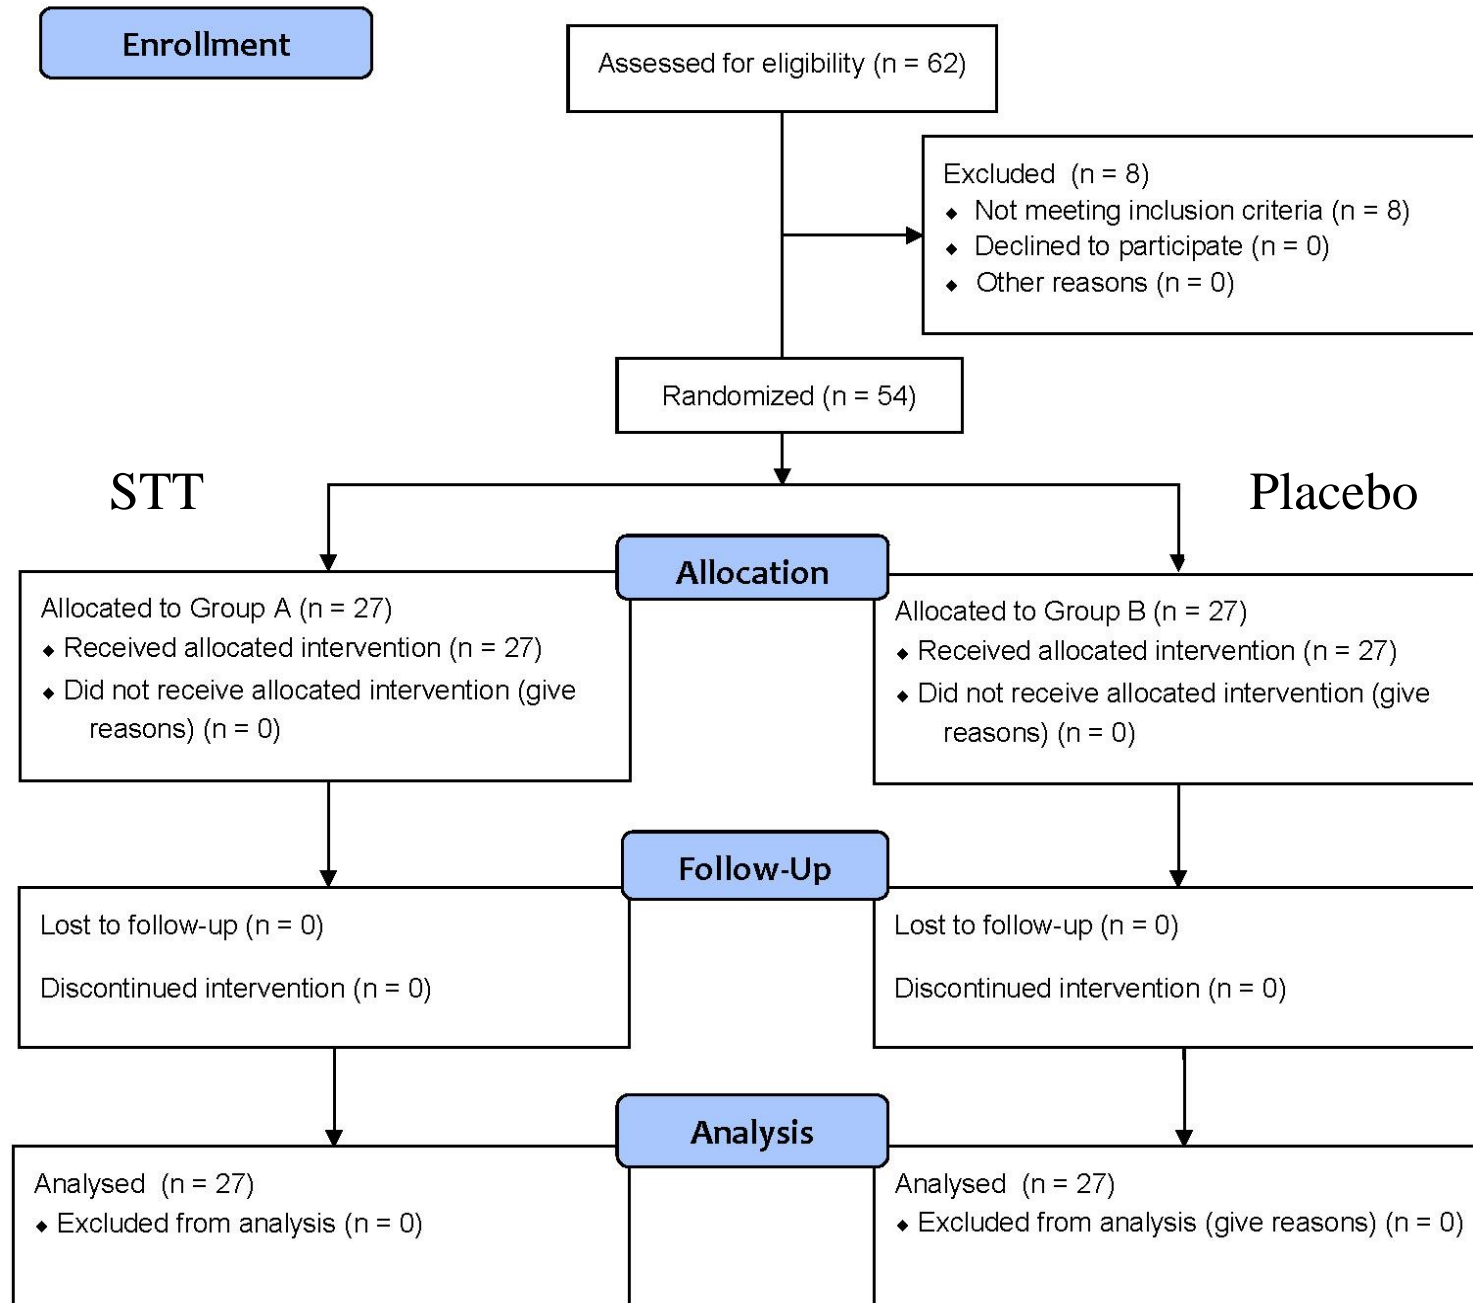

Figure 2

# IIEF-5 Scores

(a)

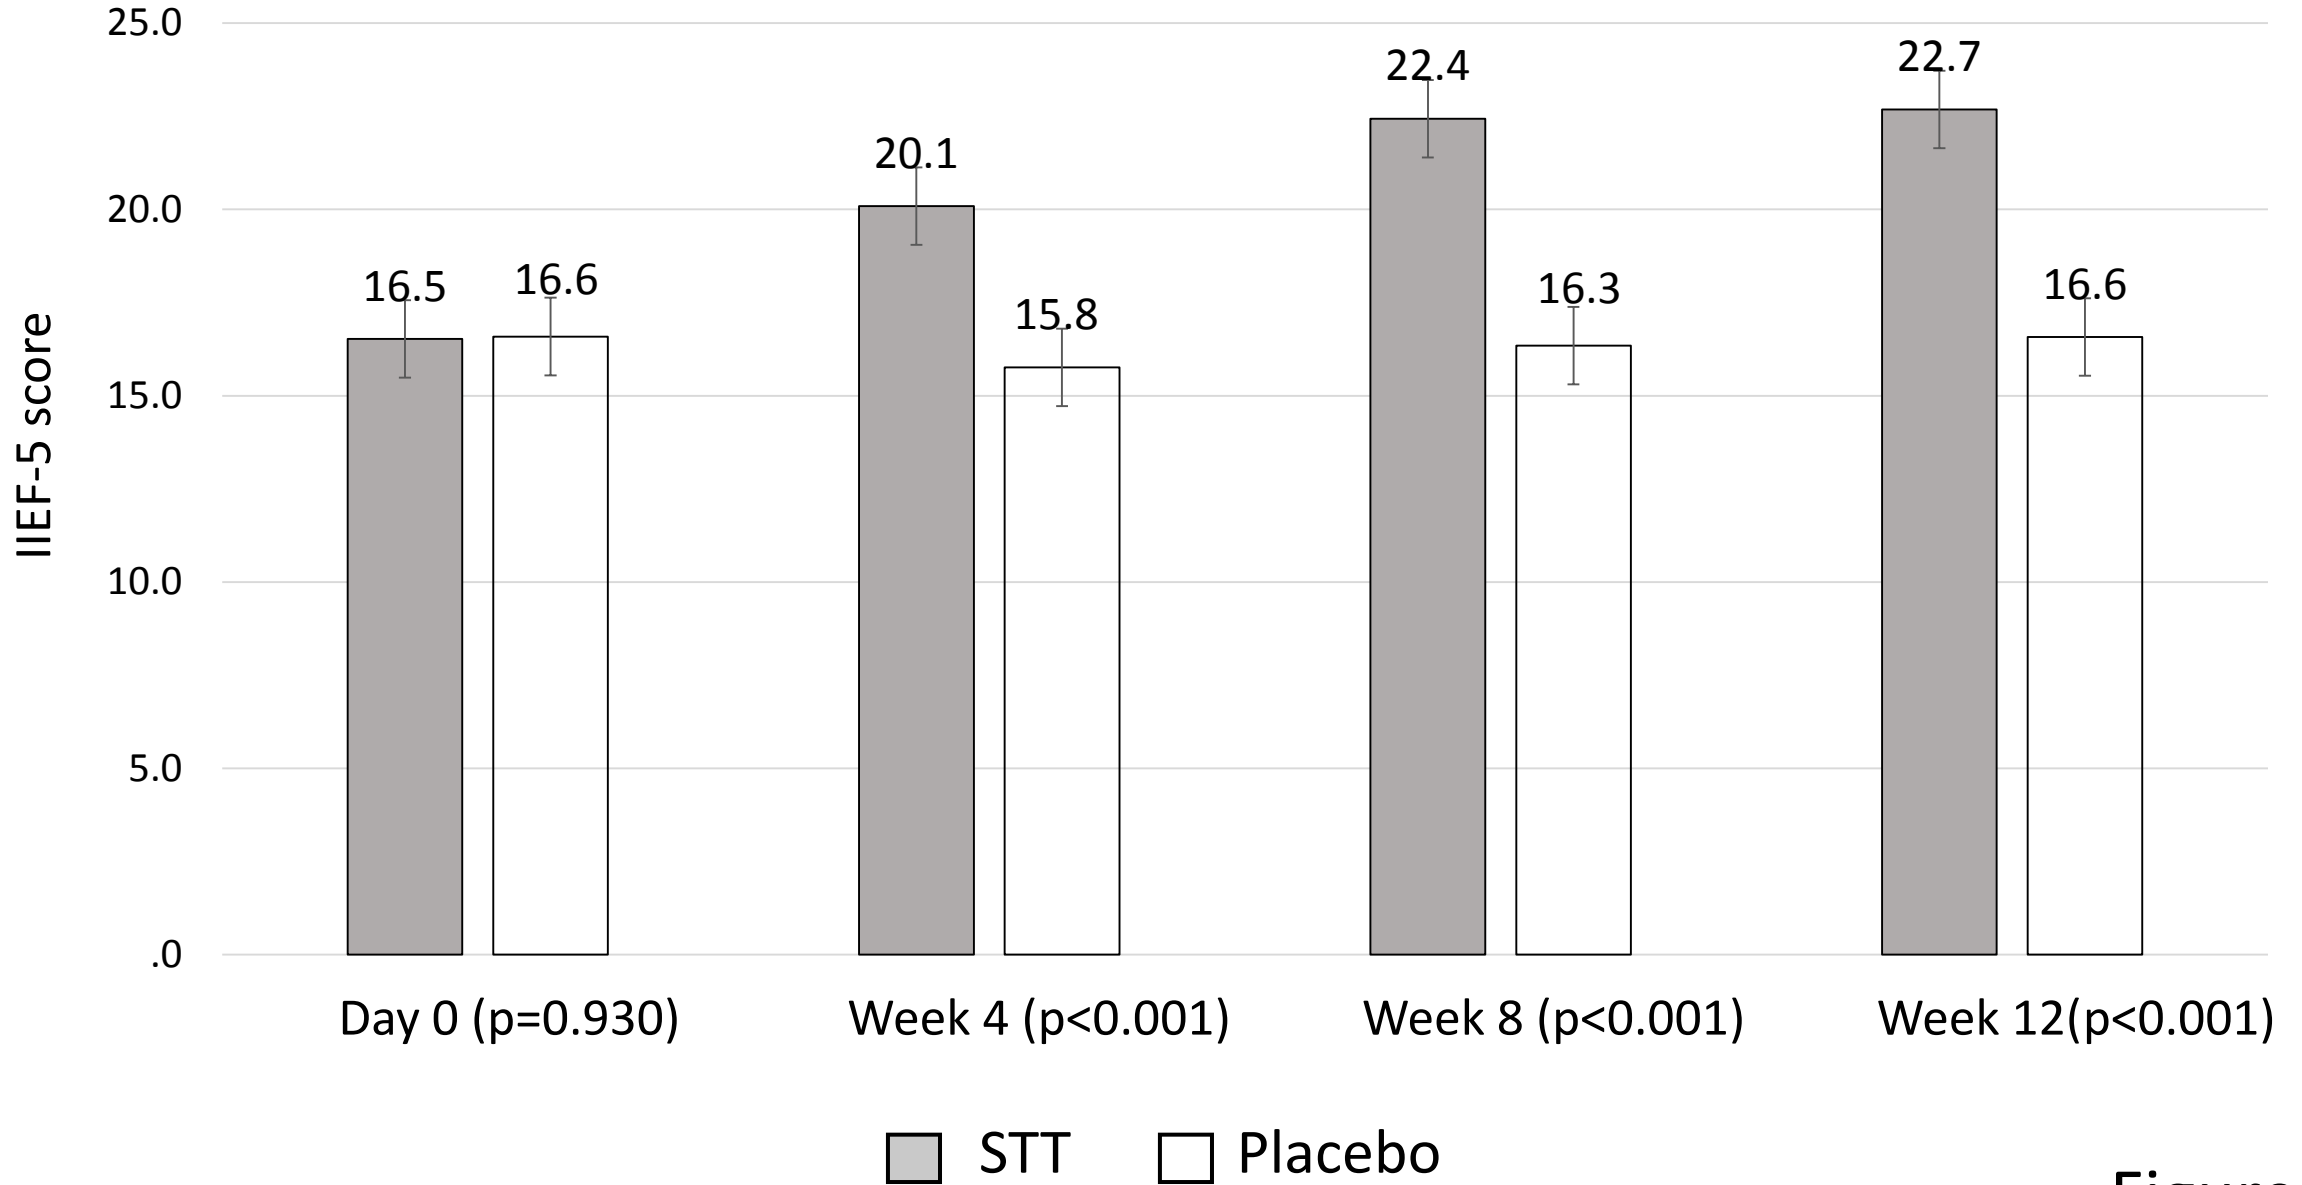

Figure 3a

# Change of IIEF-5 (before and after)

(b)

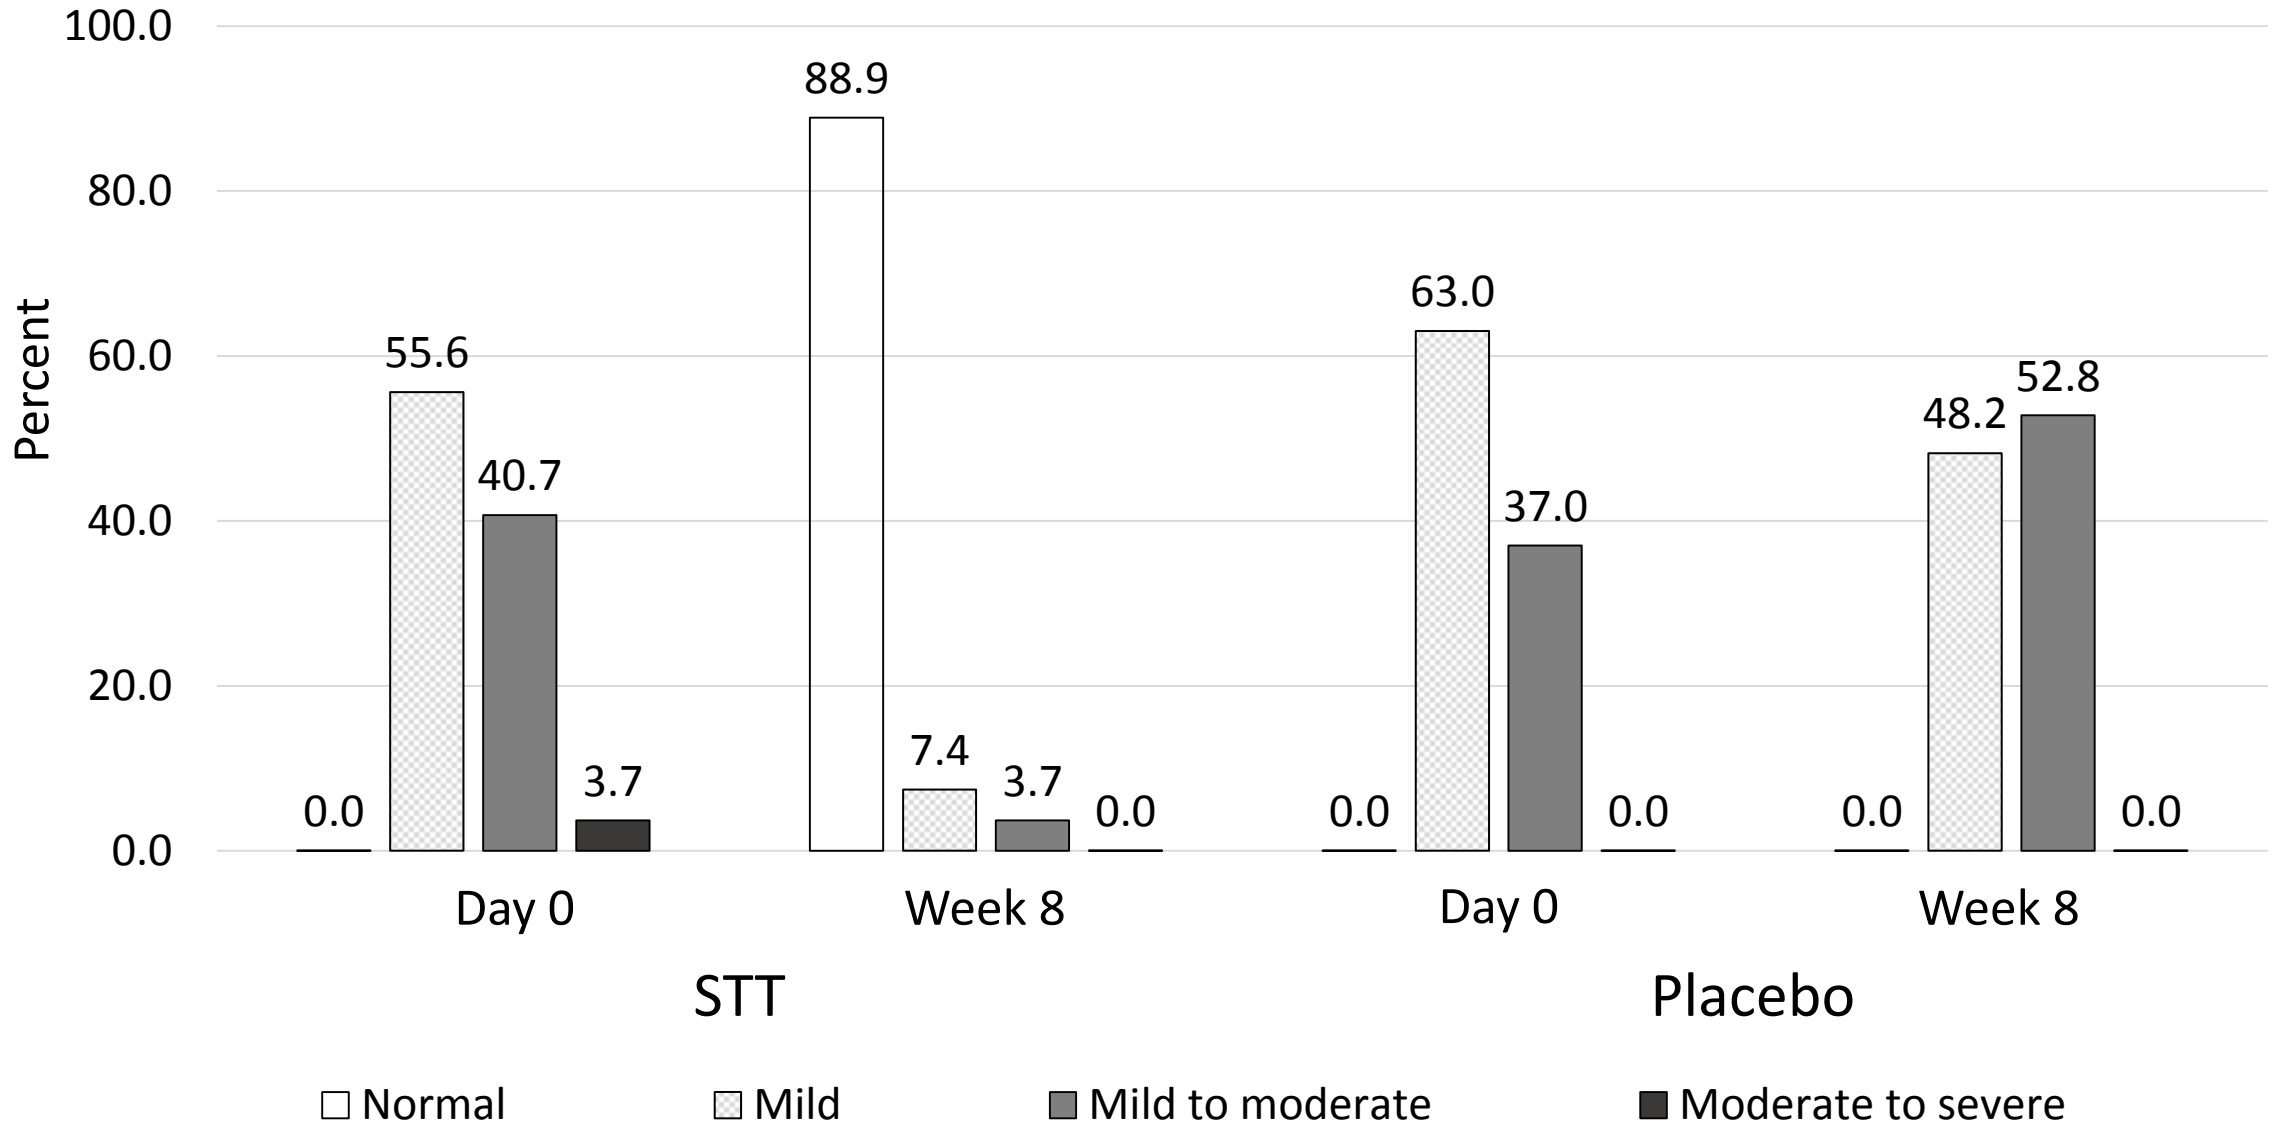

Figure 3b

# Mean QSF scores

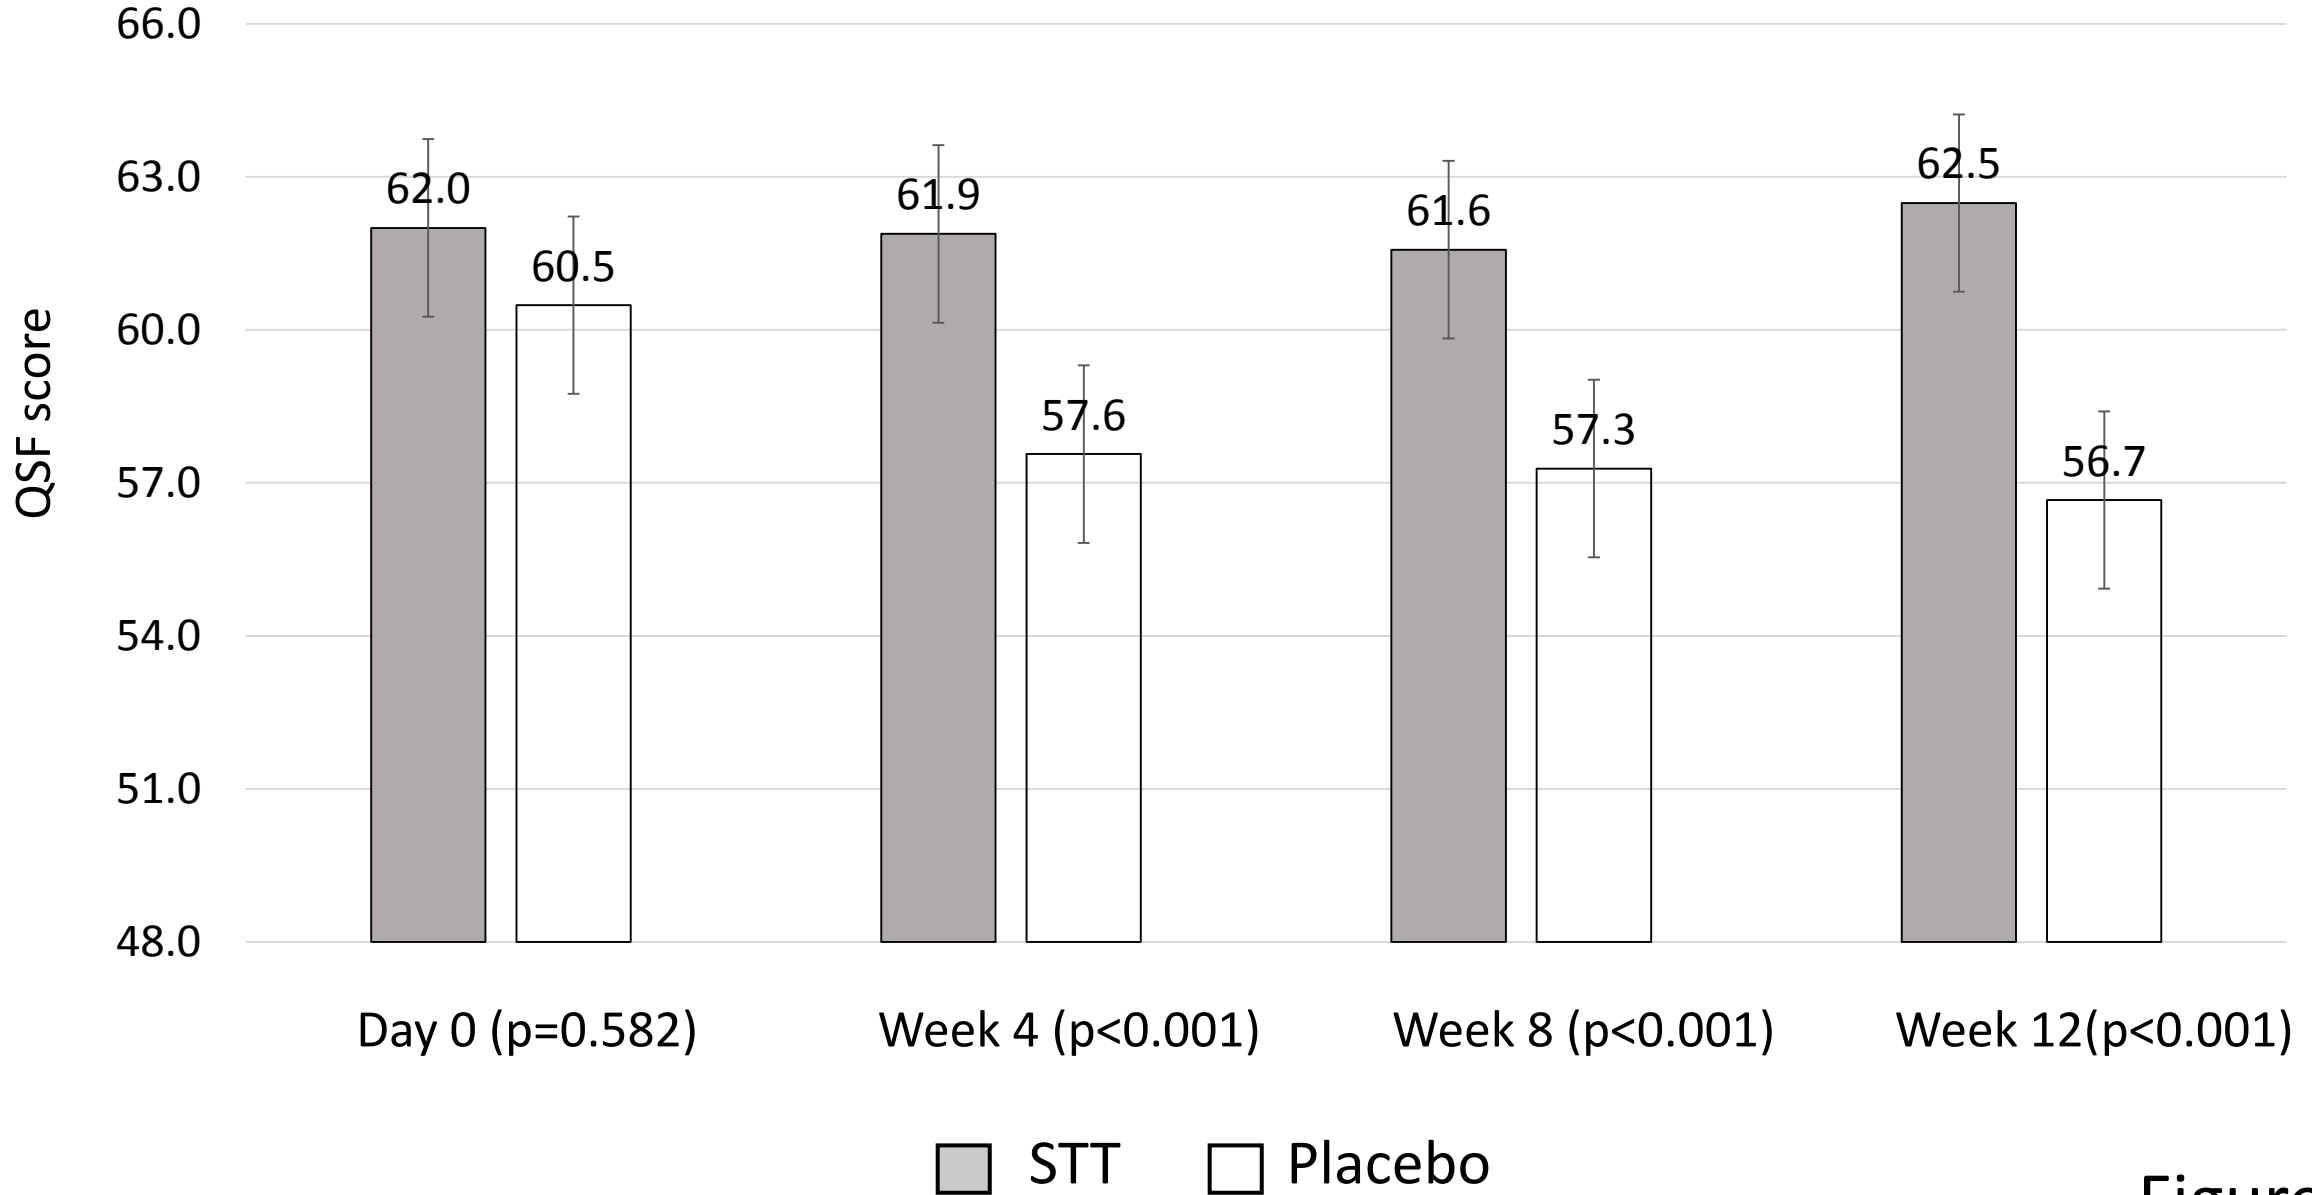

Figure 4

# QSF-Psycho-somatic Quality of life

(a)

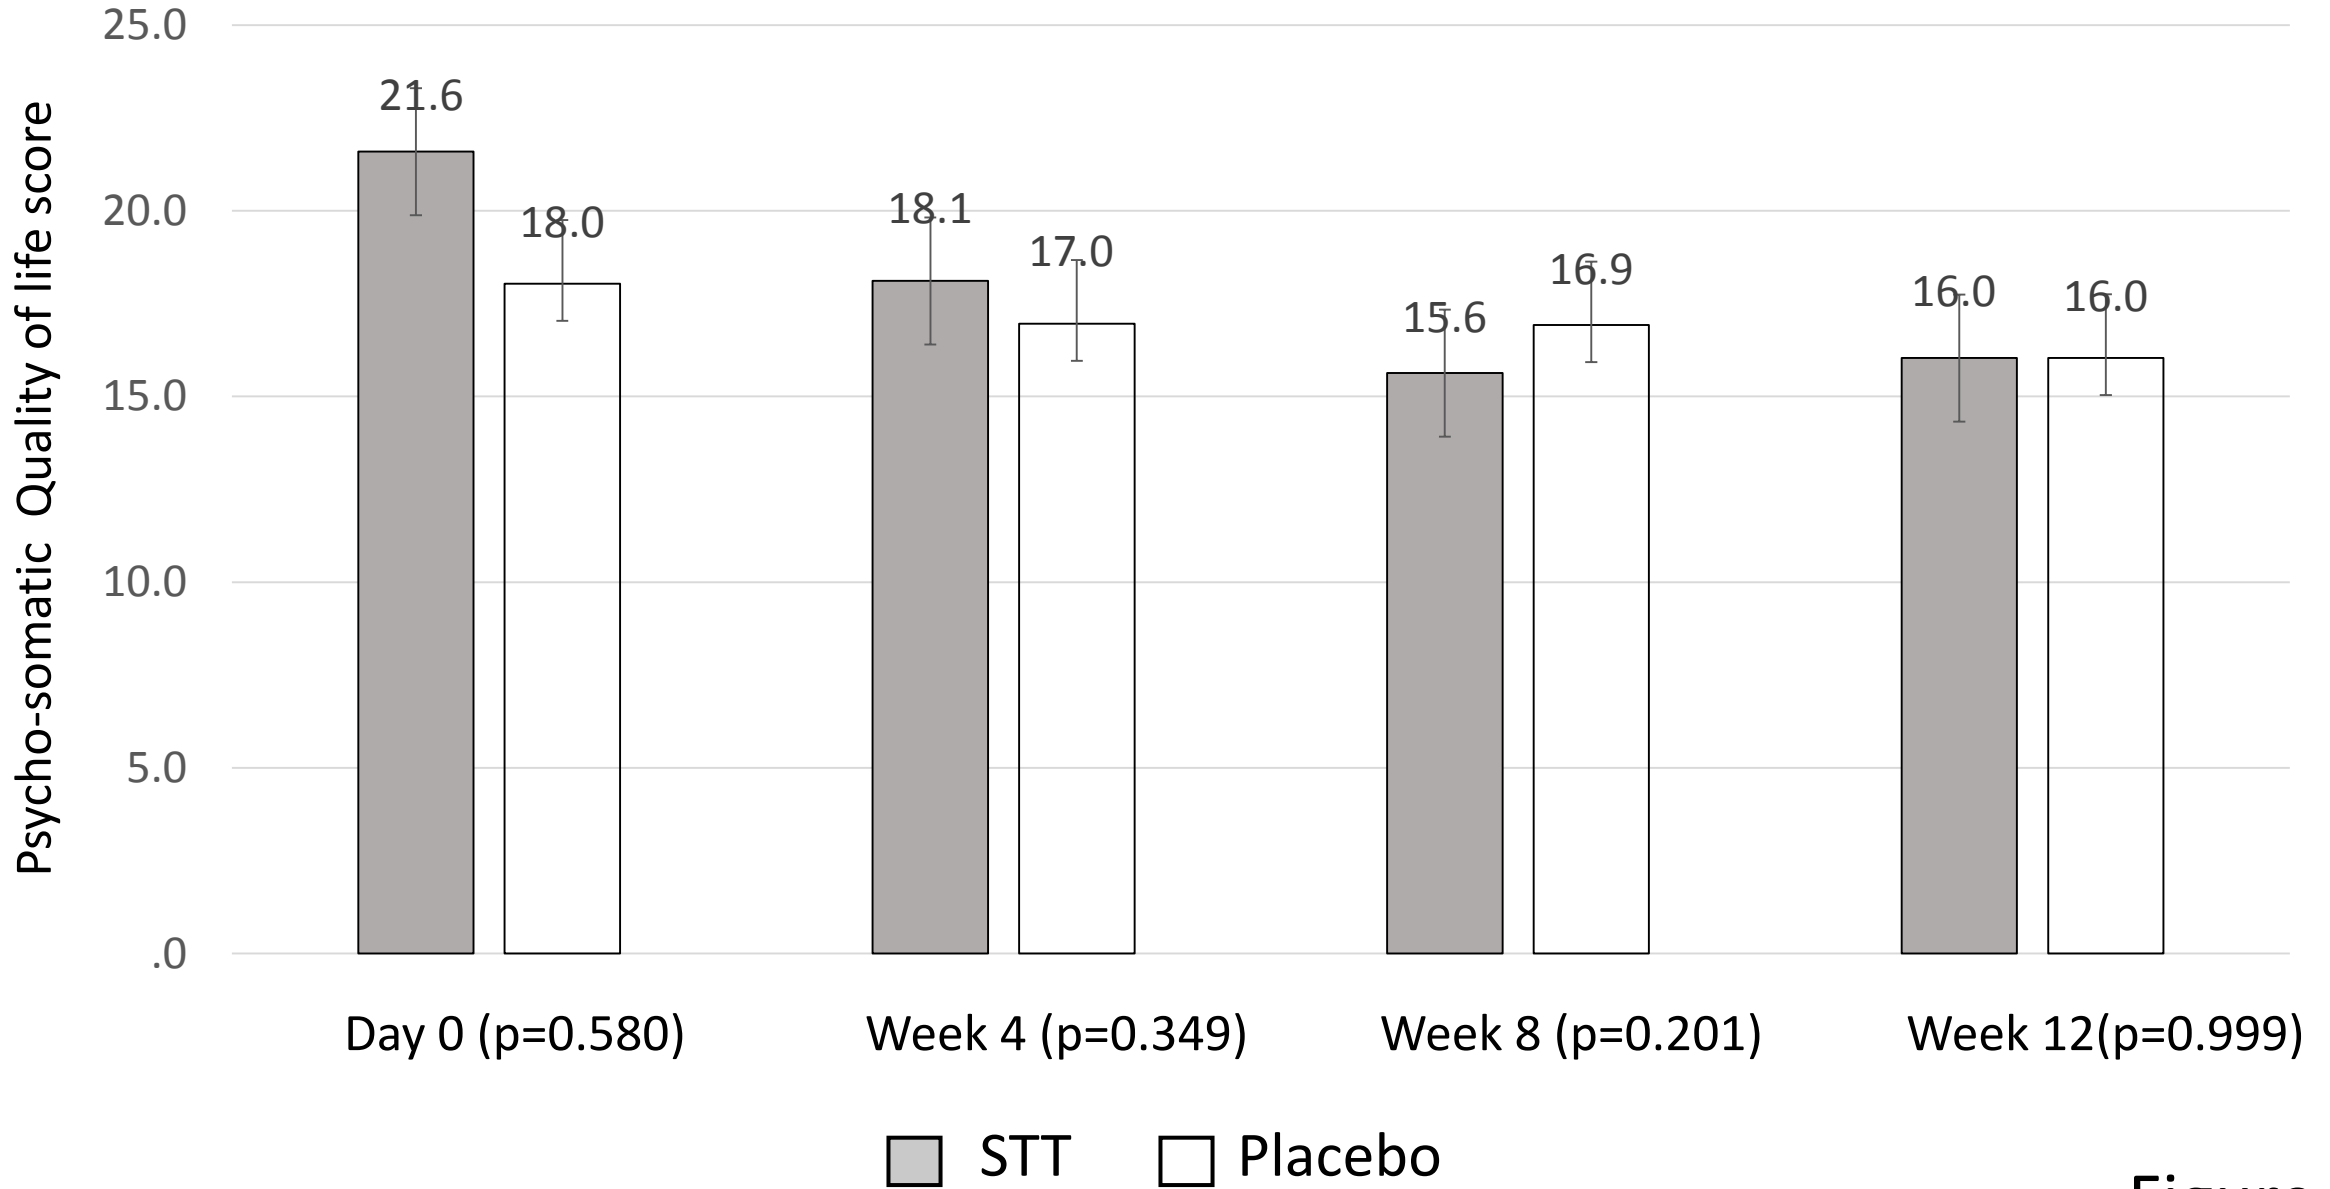

Figure 5a

# QSF-Sexual activity

(b)

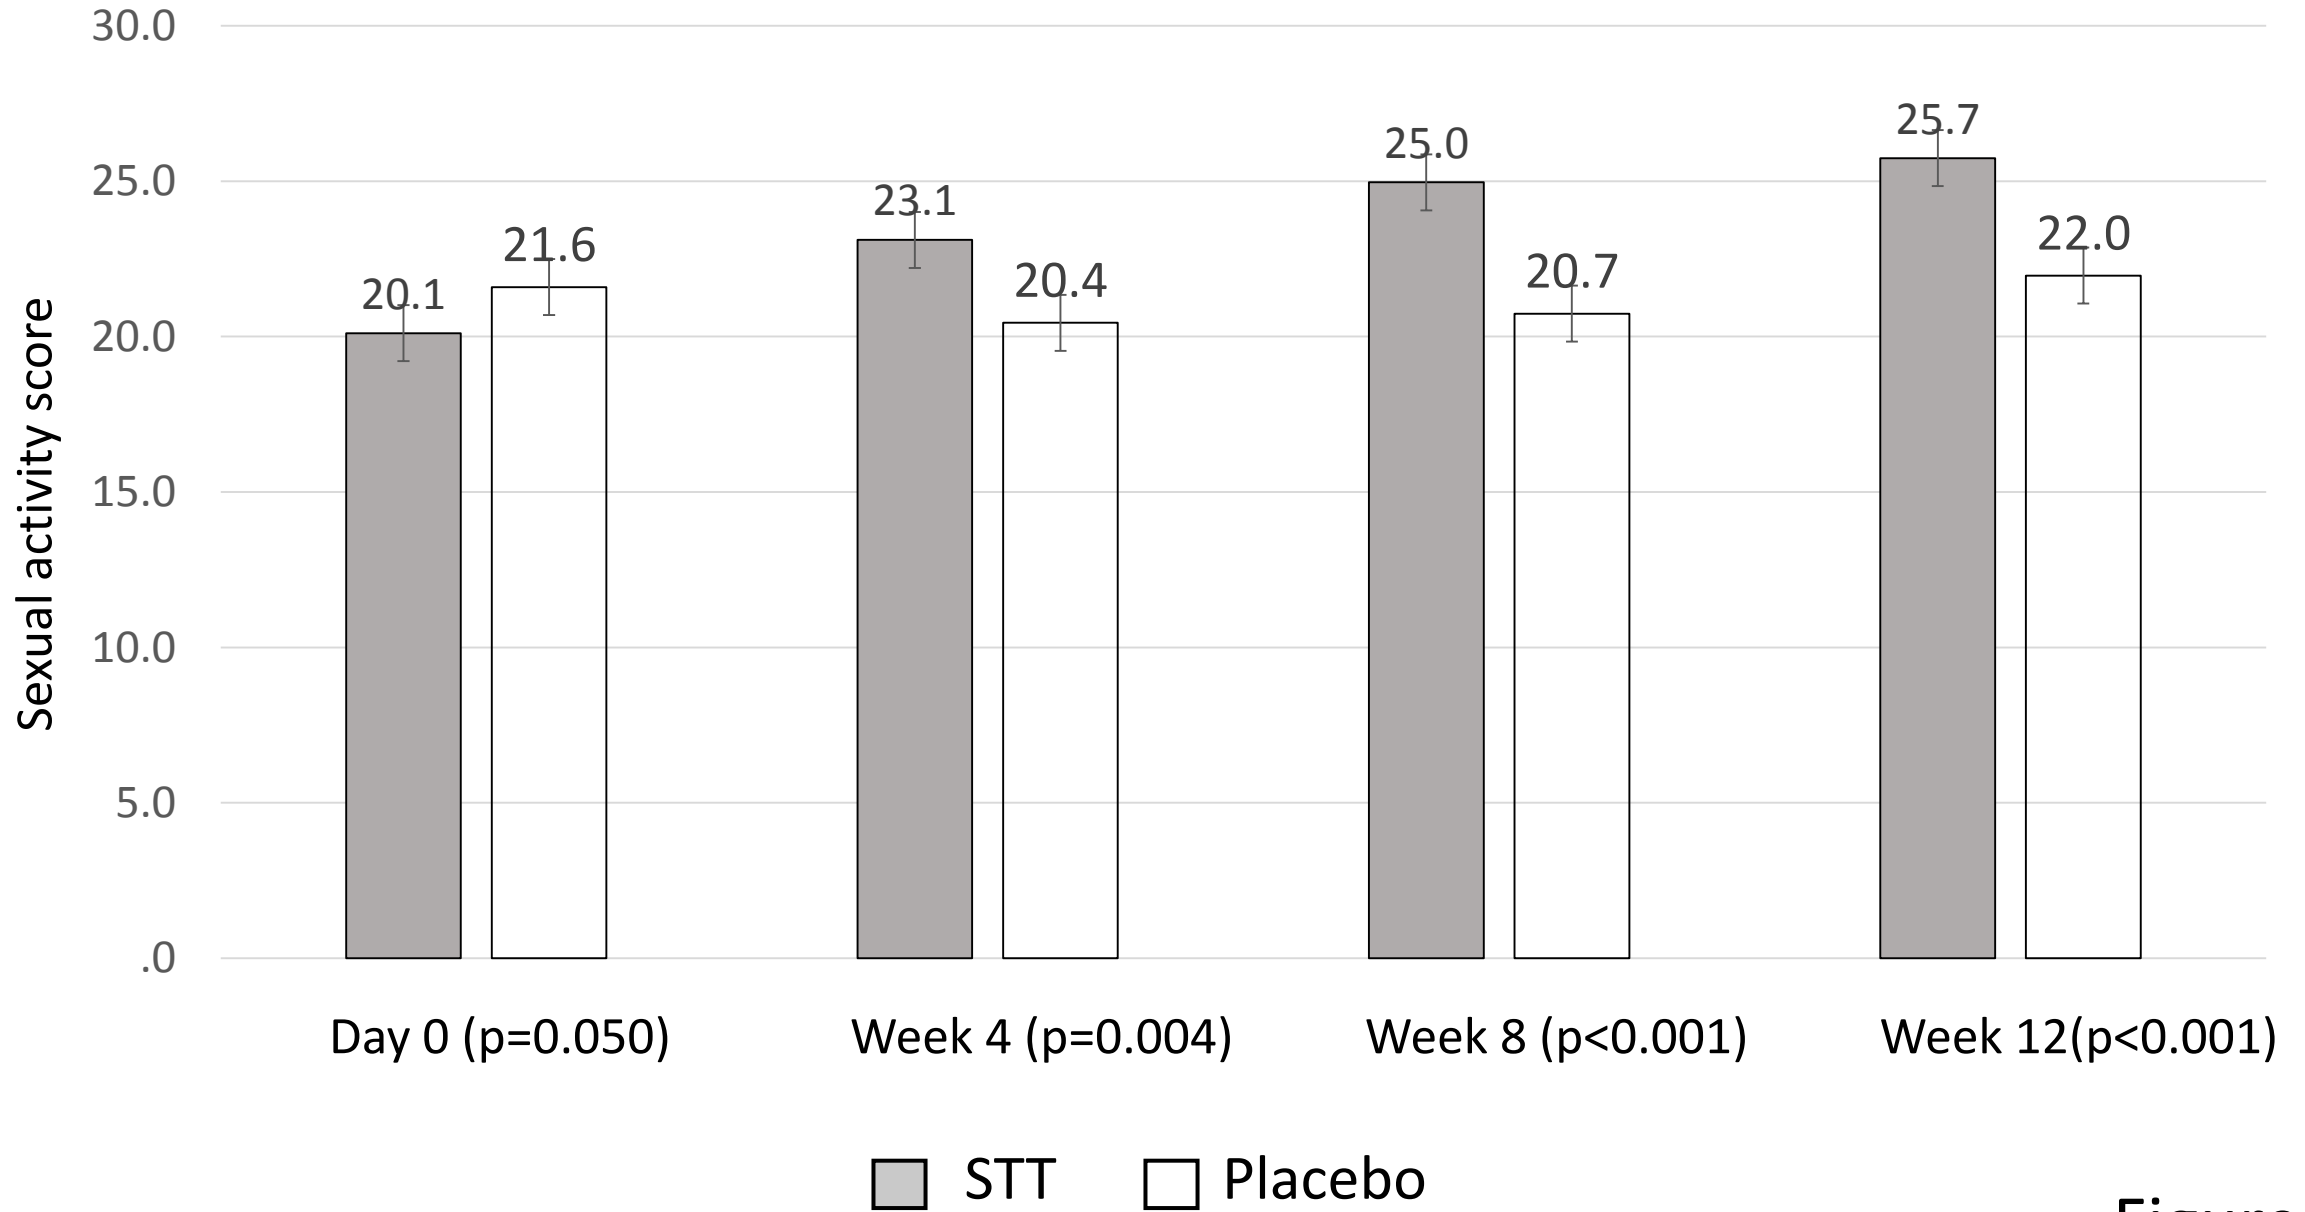

Figure 5b

# QSF-Sexual (dys)function-self-reflection

(c)

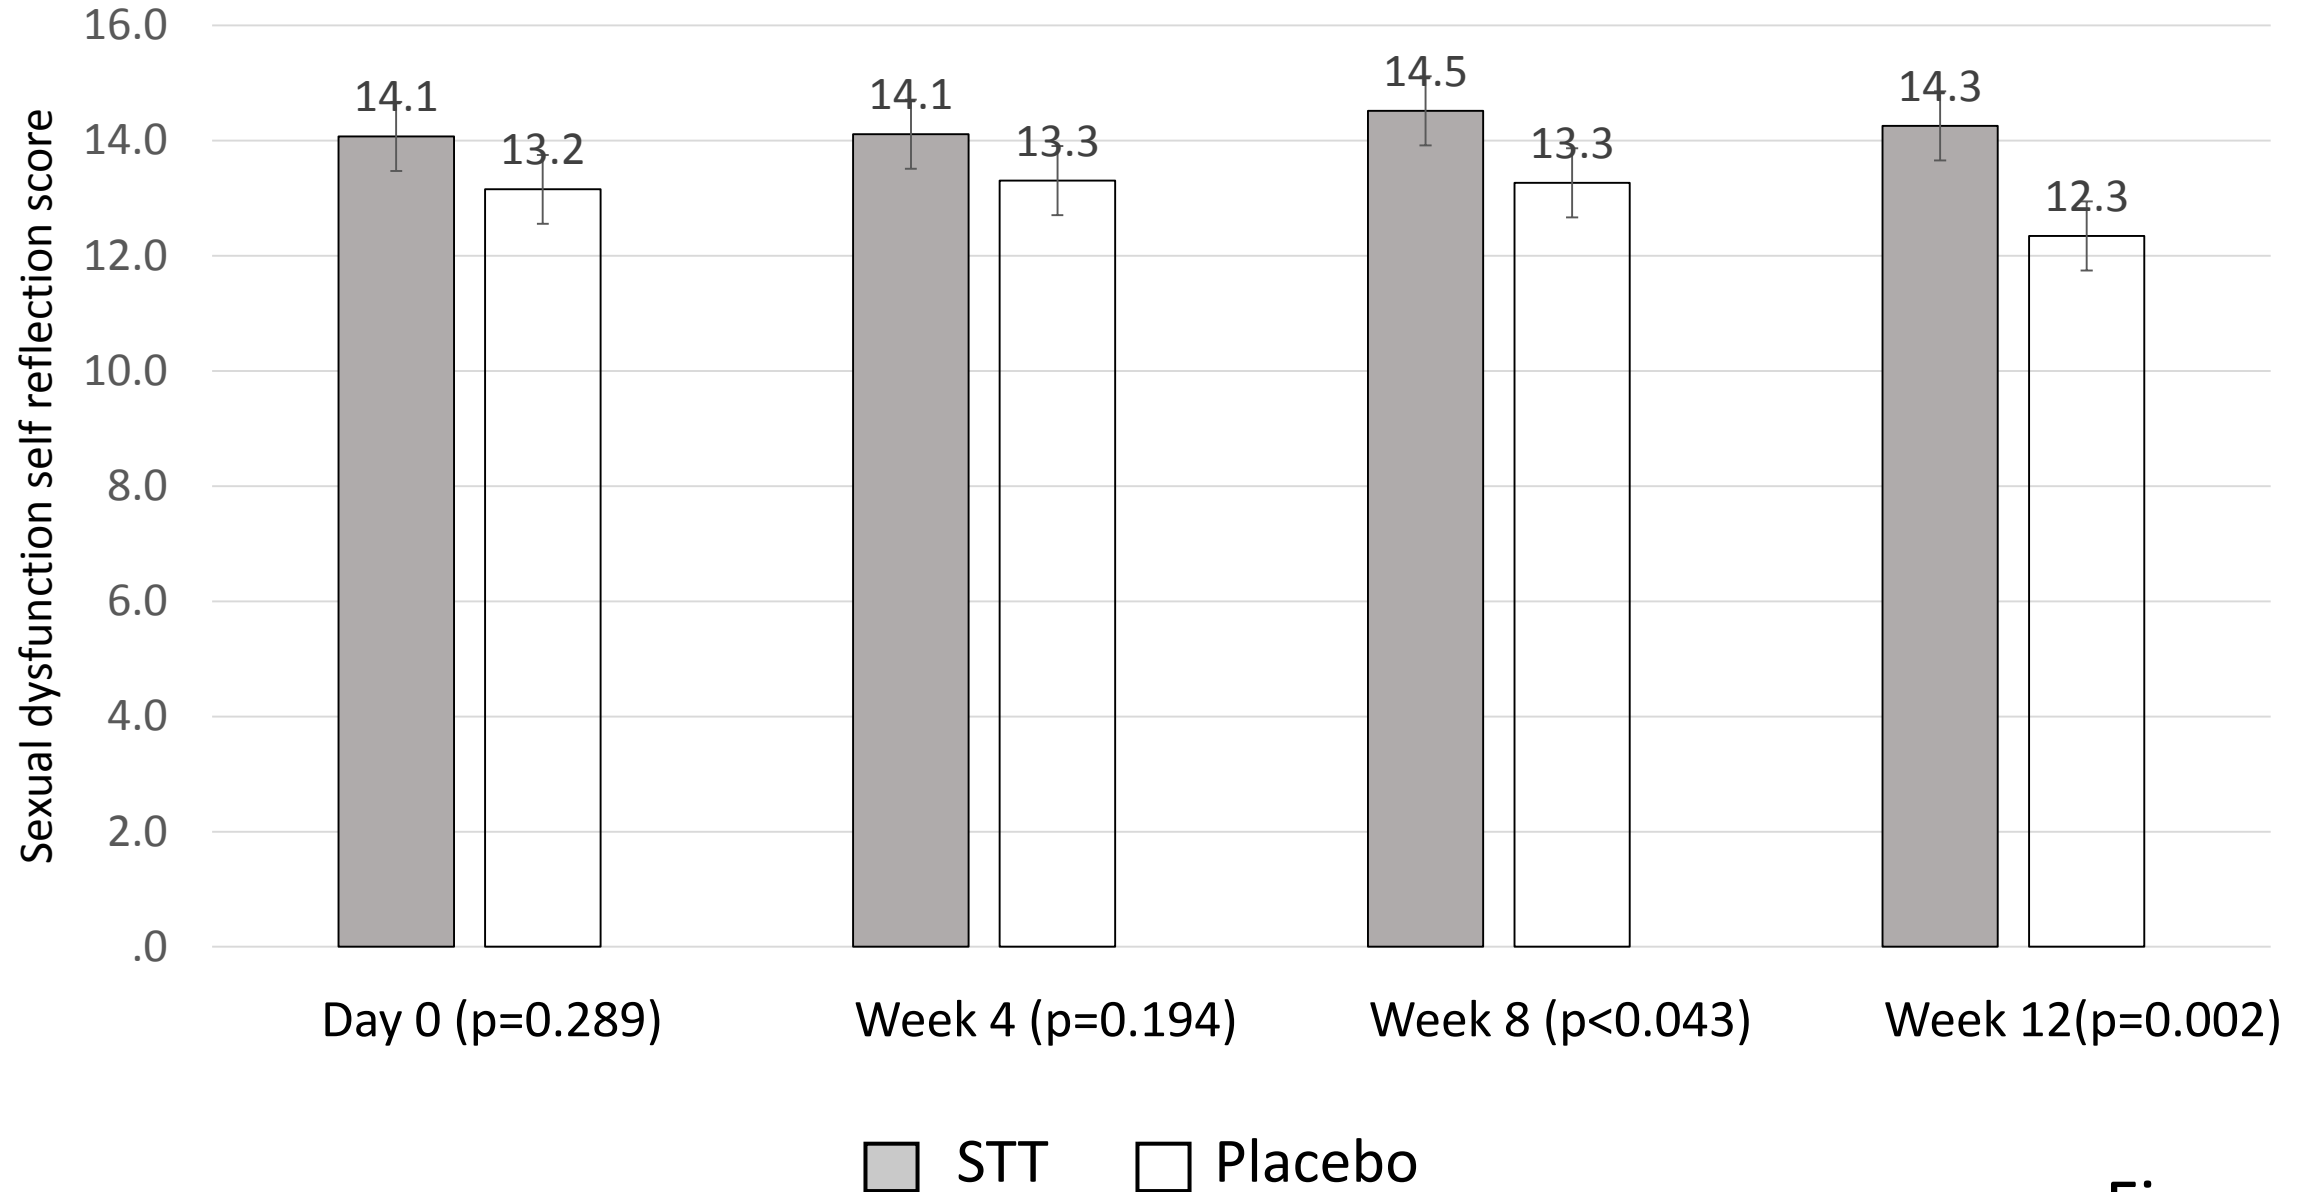

Figure 5c



# QSF-Sexual (dys)function-partner's view

(d)

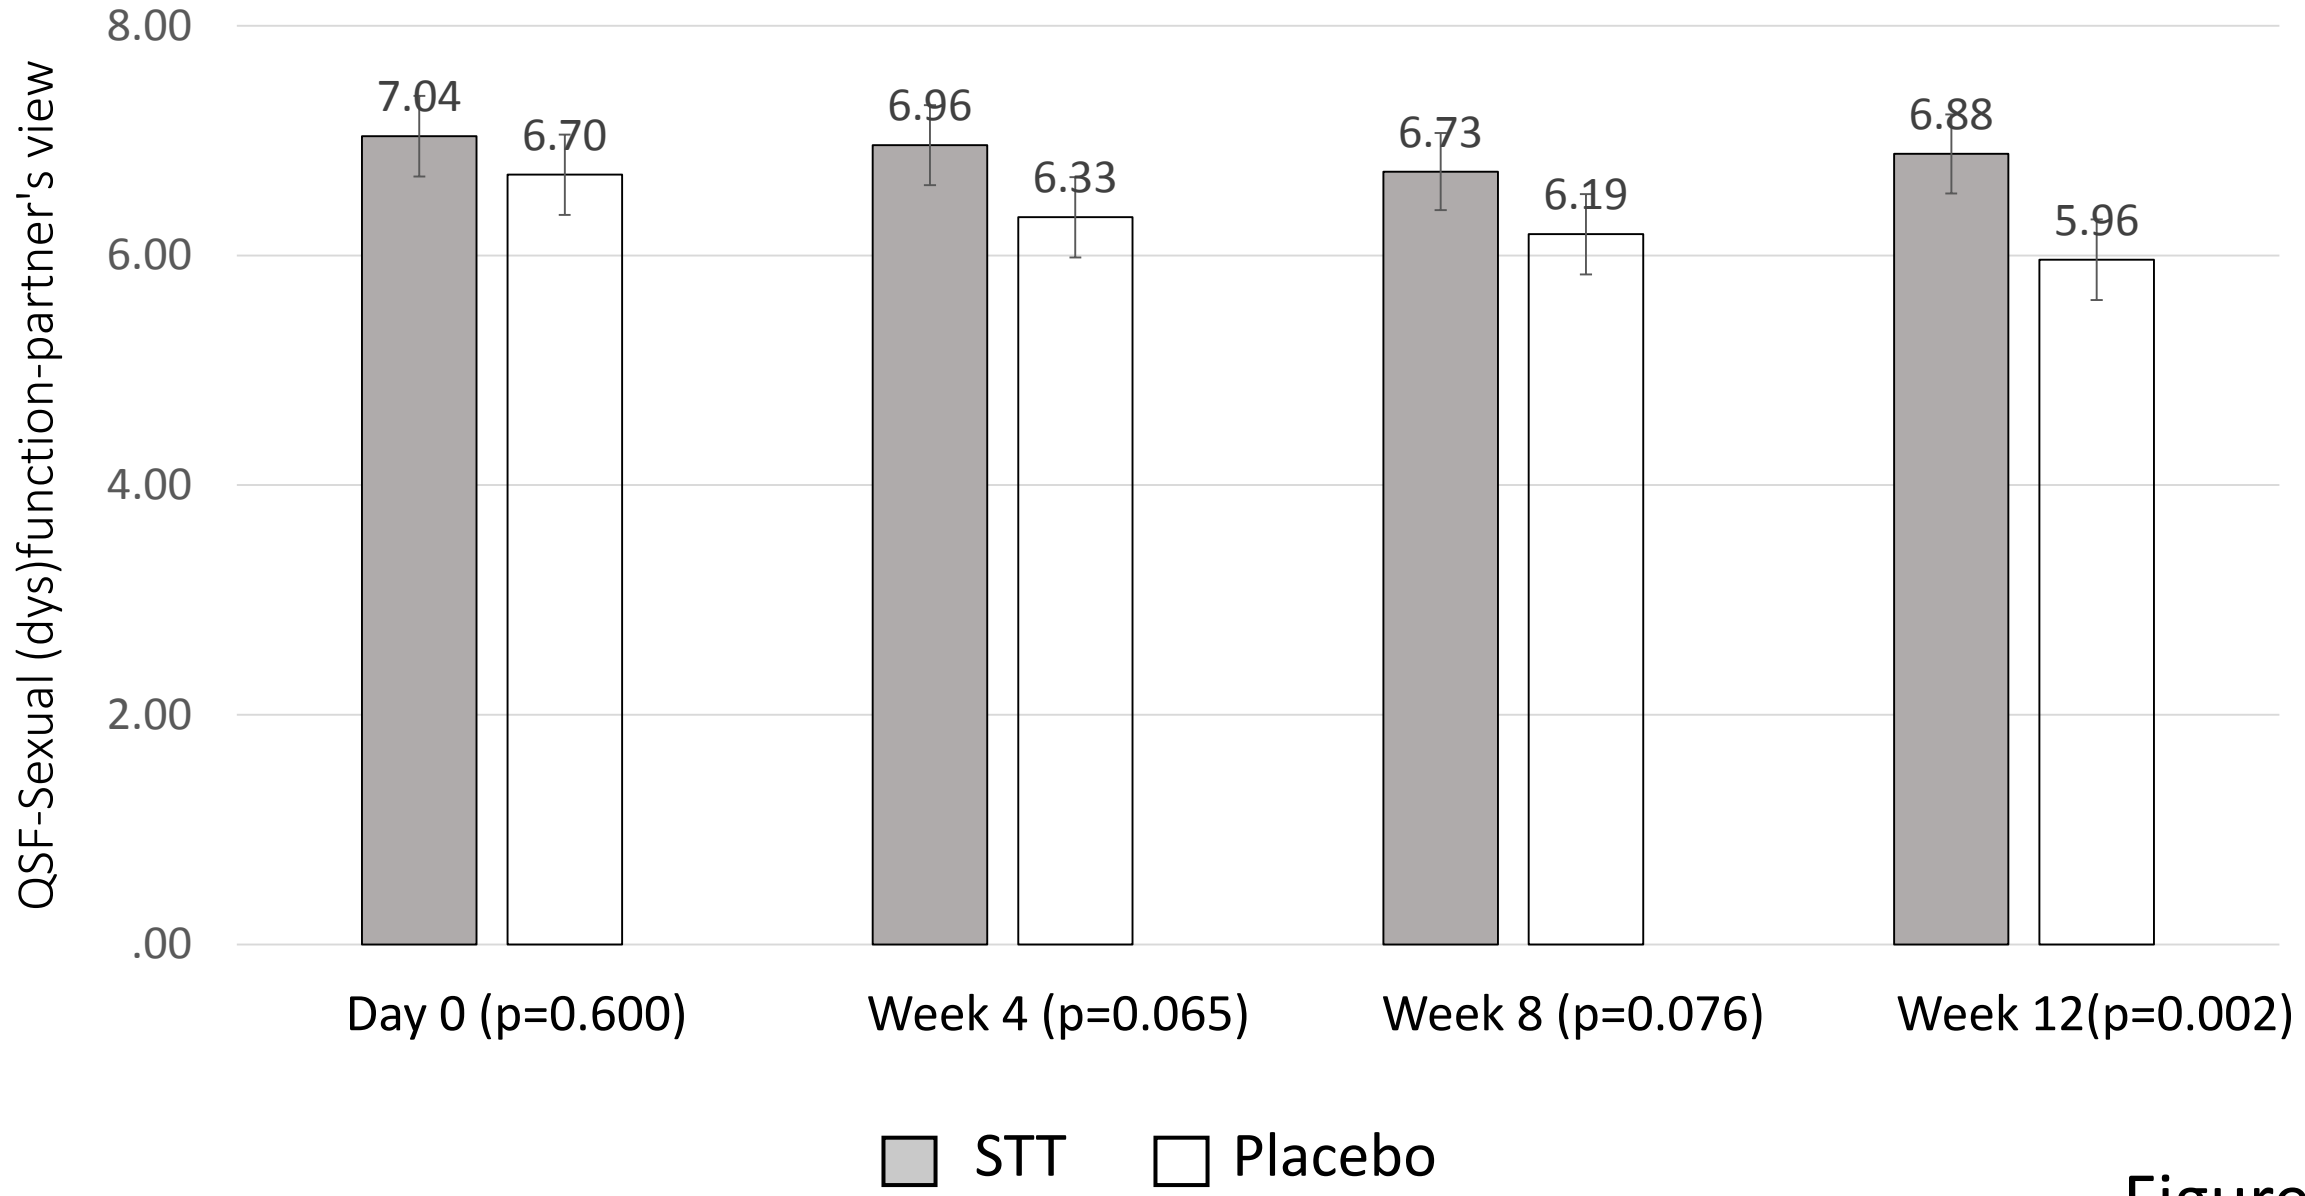

Figure 5d
